# Supplementary material
Source: PubMed Central journal article supplement (PMC3839733)
Supplement: 1318481110_pnas.201318481SI.pdf [file 1318481110_pnas.201318481SI.pdf]

# Supporting Information

Ren et al. 10.1073/pnas.1318481110

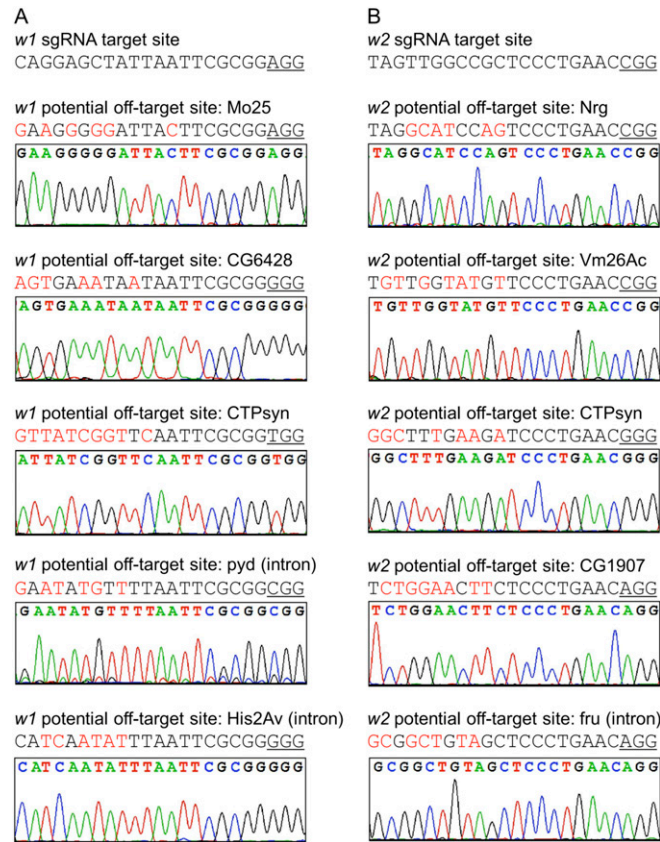

Fig. S1. Off-target analysis of w1 and w2 sgRNAs by sequencing. Representative sequencing results of the region spanning the potential off-target sites are shown. Five sites each for w1 (A) and w2 (B) sgRNA were tested, and no obvious double peaks were observed.
